# Supplementary material
Source: publisher figshare collection journal article supplement (https://acs.figshare.com/ndownloader/files/3824251)
Supplement: Supplementary file 1 [file 3824251]

## ***Supplementary information***

### **Enzyme Homologues Have Distinct Reaction Paths through their Transition States**

Ioanna Zoi,<sup>†</sup> Matthew W. Motley,<sup>‡</sup> Dimitri Antoniou,<sup>†</sup> Vern L. Schramm,<sup>‡</sup> and Steven D. Schwartz<sup>\*,†</sup>

*Department of Chemistry and Biochemistry, University of Arizona, 1306 East University Blvd., Tucson, AZ 85721, and Department of Biochemistry, Albert Einstein College of Medicine, 1300 Morris Park Ave, Bronx, NY 10461*

E-mail: sschwartz@email.arizona.edu

Phone: (520) 621-6363

---

<sup>\*</sup>To whom correspondence should be addressed

<sup>†</sup>Department of Chemistry and Biochemistry, University of Arizona, 1306 East University Blvd., Tucson, AZ 85721

<sup>‡</sup>Department of Biochemistry, Albert Einstein College of Medicine, 1300 Morris Park Ave, Bronx, NY 10461

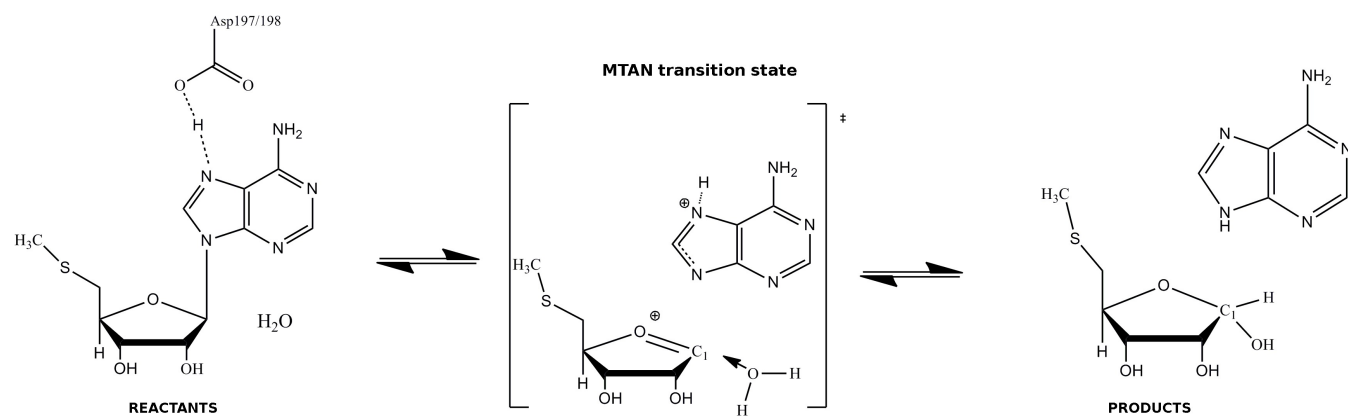

**Figure S1:** Reaction scheme of the catalytic mechanism.

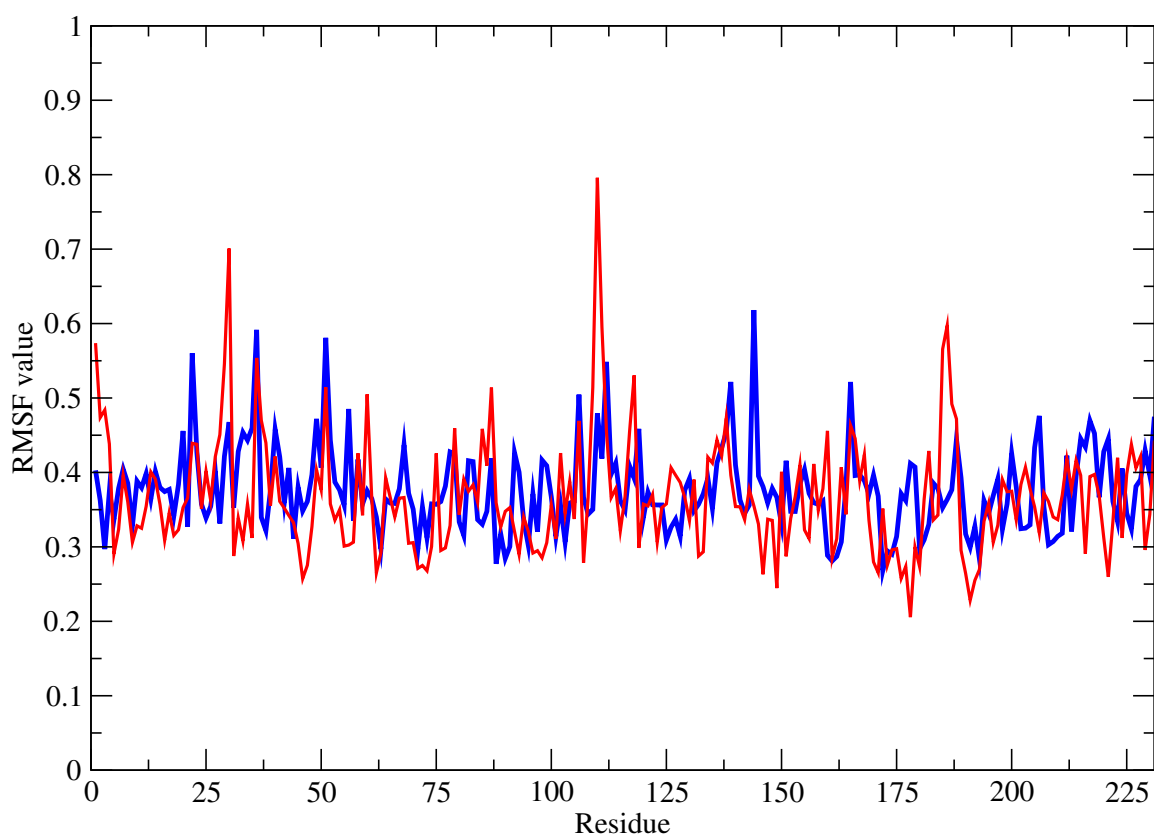

**Figure S2:** RMSF comparison between *V. cholerae* (blue) and *E. coli* (red) MTAN for reactive trajectories of 250fs.

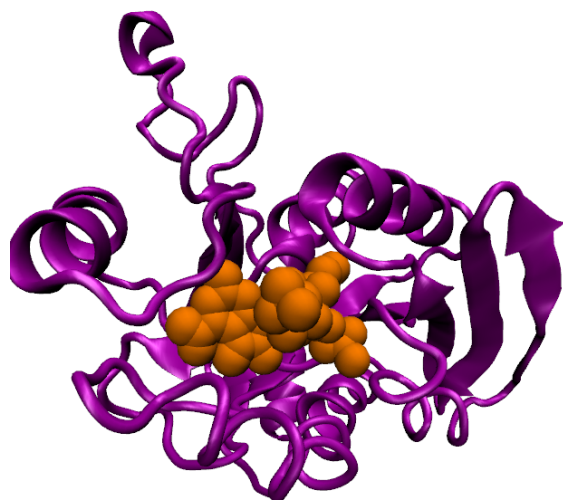

(a)

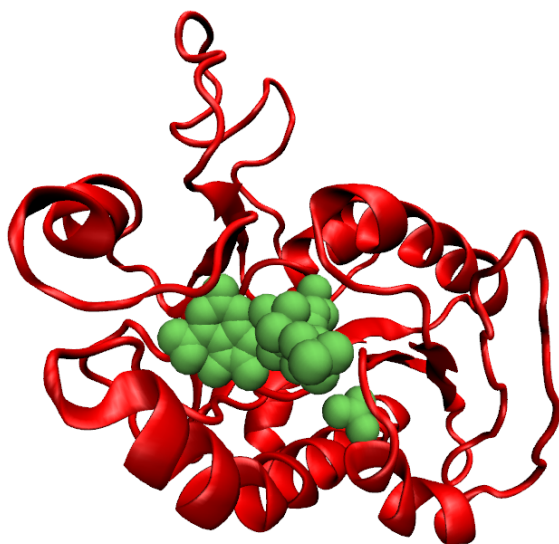

(b)

**Figure S3:** (a) Active site volume of *Vibrio cholerae* MTAN, QM region (orange) (b) Active site volume of *Escherichia coli* MTAN, QM region (green).

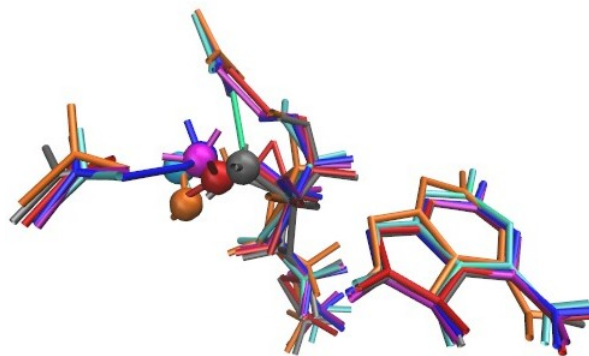

**Figure S4:** Superimposition of 6 transition state structures of VcMTAN. The catalytic water is given by a different color ball in each TS structure (orange, red, grey, magenta, blue, light blue ). 5 distinct orientations are visible in this diagram, one obscured.

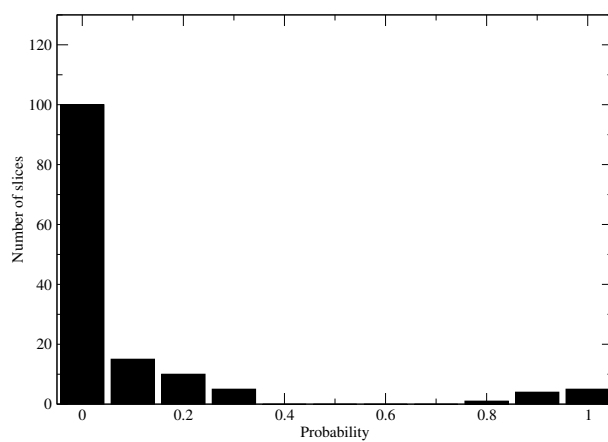

**Figure S5:** Committor distribution for VcMTAN constraining only C1'-N9, C1'-Ow distances.

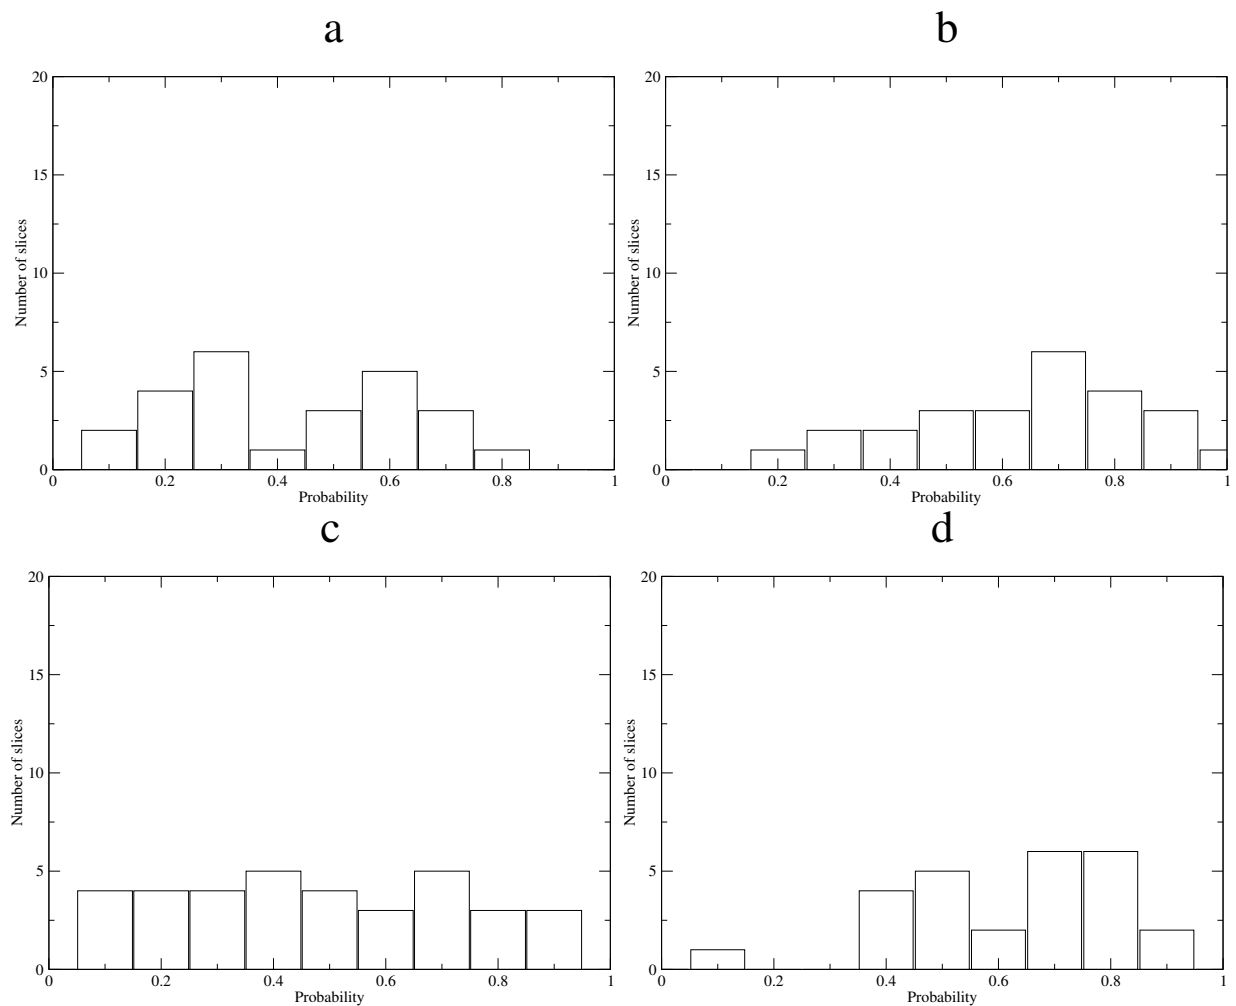

**Figure S6:** (a) to (d) Committor distribution for VcMTAN constraining C1'-N9, C1'-Ow distances and QM region of the active site for TS1 to TS4 respectively.

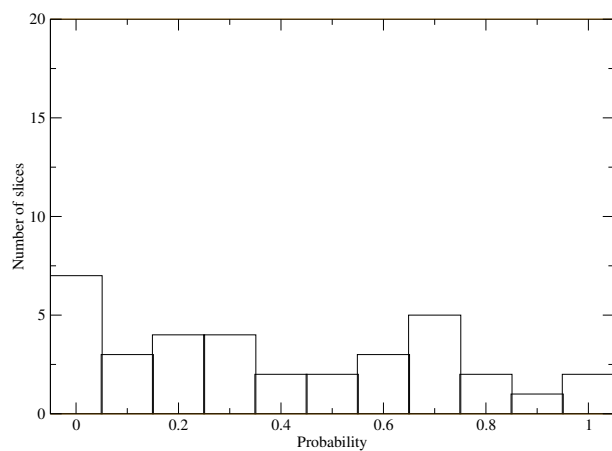

**Figure S7:** Committor distribution for TS1, with the set of residues found for TS3.

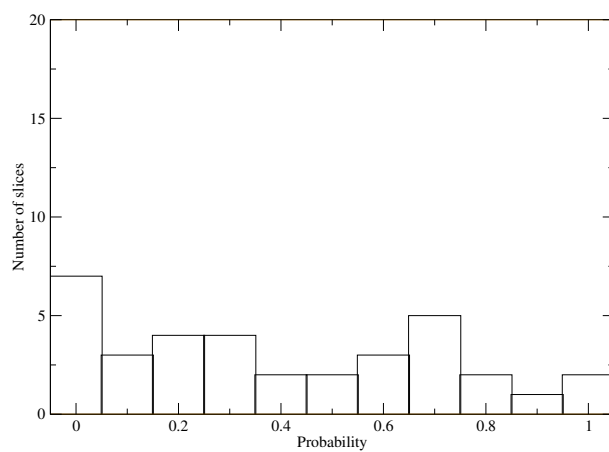

**Figure S8:** Committor distribution for EcMTAN when we applied the set of residues of TS3.

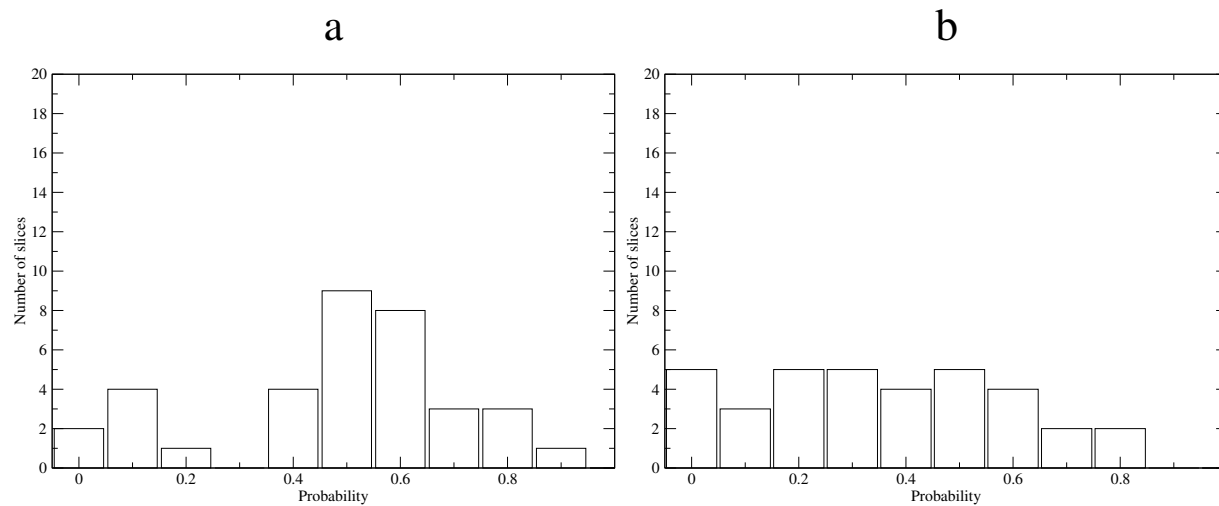

**Figure S9:** (a) Committor distribution for EcMTAN, constraining C1'-N9, C1'-Ow distances. (b) Committor distribution for EcMTAN, constraining C1'-N9, C1'-Ow distances and active site.

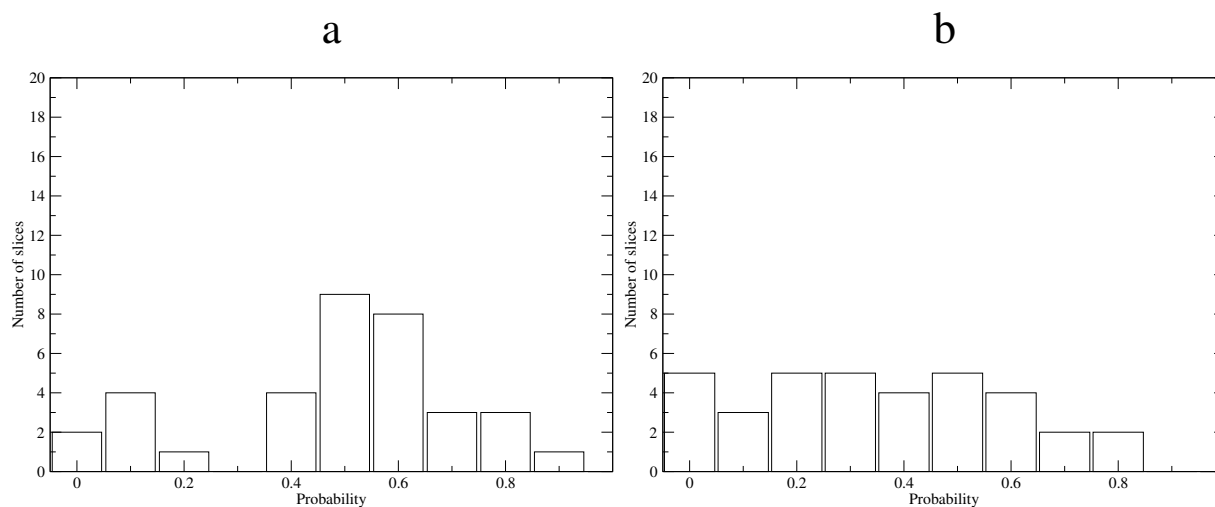

**Figure S10:** (a) Committor distribution of TS4 of VcMTAN and (b) Committor distribution of TS3 of VcMTAN applying the set of residues we found for EcMTAN.

## Video

Supplementary video 1: Representative Reaction Coordinate for VcMTAN. The active site is colored yellow, the oxygen of the catalytic water molecule is represented by a red ball and the anomeric carbon by a grey ball. The trajectory length is 250 fs.

Supplementary video 2: Reaction Coordinate for EcMTAN. The active site is colored orange, the oxygen of the catalytic water molecule is represented by a red ball and the anomeric carbon by a grey ball. The trajectory length is 250 fs.
